CORRECTION

# Correction: Metal-Induced Production of a Novel Bioadsorbent Exopolysaccharide in a Native *Rhodotorula mucilaginosa* from the Mexican Northeastern Region

**Maria Teresa Garza-Gonzalez, Daniel Barboza Perez, Augusto Vazquez Rodriguez, Domingo Ixcoatl Garcia-Gutierrez, Xristo Zarate, Maria Elena Cantú Cardenas, Ludwing Ilytch Urraca-Botello, Ulrico Javier Lopez-Chuken, Alberto Ludovico Trevino-Torres, Felipe de Jesus Cerino-Córdoba, Pavel Medina-Ruiz, Juan Francisco Villarreal-Chiu, Jose Ruben Morones-Ramirez**

The first author's name is spelled incorrectly. The correct name is: Maria Teresa Garza-Gonzalez. The correct citation is: Garza-Gonzalez MT, Barboza Perez D, Vazquez Rodriguez A, Garcia-Gutierrez DI, Zarate X, Cantú Cardenas ME, et al. (2016) Metal-Induced Production of a Novel Bioadsorbent Exopolysaccharide in a Native *Rhodotorula mucilaginosa* from the Mexican Northeastern Region. PLoS ONE 11(2): e0148430. doi:[10.1371/journal.pone.0148430](https://doi.org/10.1371/journal.pone.0148430)

## Reference

1. Gonzalez Garza MT, Barboza Perez D, Vazquez Rodriguez A, Garcia-Gutierrez DI, Zarate X, Cantú Cardenas ME, et al. (2016) Metal-Induced Production of a Novel Bioadsorbent Exopolysaccharide in a Native *Rhodotorula mucilaginosa* from the Mexican Northeastern Region. PLoS ONE 11(2): e0148430. doi: [10.1371/journal.pone.0148430](https://doi.org/10.1371/journal.pone.0148430) PMID: [26828867](https://pubmed.ncbi.nlm.nih.gov/26828867/)

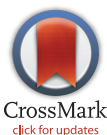

## OPEN ACCESS

**Citation:** Garza-Gonzalez MT, Barboza Perez D, Vazquez Rodriguez A, Garcia-Gutierrez DI, Zarate X, Cantú Cardenas ME, et al. (2016) Correction: Metal-Induced Production of a Novel Bioadsorbent Exopolysaccharide in a Native *Rhodotorula mucilaginosa* from the Mexican Northeastern Region. PLoS ONE 11(2): e0150522. doi:[10.1371/journal.pone.0150522](https://doi.org/10.1371/journal.pone.0150522)

**Published:** February 25, 2016

**Copyright:** © 2016 Garza-Gonzalez et al. This is an open access article distributed under the terms of the [Creative Commons Attribution License](https://creativecommons.org/licenses/by/4.0/), which permits unrestricted use, distribution, and reproduction in any medium, provided the original author and source are credited.
